# Supplementary material for: Educating the future generation of researchers: A cross-disciplinary survey of trends in analysis methods
Source: PLoS Biol. 2021 Jul 29;19(7):e3001313. doi: 10.1371/journal.pbio.3001313 (PMC8321514; doi:10.1371/journal.pbio.3001313)
Supplement: S3 Data — Excel spreadsheet containing the standardized chi-squared residuals for each analytic method by discipline. (XLSX) [file pbio.3001313.s007.xlsx]

## Sheet: Analysis_Method_Residuals
Discipline	adaboost	akaike information criterion	analysis of similarity	ancova	anova	area under the curve	arma/arima	autocorrelation/cross-correlation	bayes factor	bayes rule	bayesian estimation - general	bayesian hierarchical model	bayesian information criterion	bayesian network	bayesian posterior	bayesian prior	bernoulli distribution	beta distribution	biclustering	binomial regression	binomial test	bionomial distribution	bland altman analysis	bootstrapping	branch and bound algorithm	canonical correlation	chi square distribution	chi square test	cholesky factorization	classification accuracy	cluster analysis - general	cochran armitage test	coefficient of variation	conditional logistic regression	confidence interval	confirmatory factor analysis	content analysis	contingency table	contrast coding	correlation	correspondence analysis	covariance	covariance estimation	cox regression	credible interval	cronbach's alpha	dag	decision tree	density based clustering
ANIMAL	-5.93957	40.3515	57.5684	-7.2408	73.2612	-31.0103	-8.03342	1.39484	-0.745459	-2.85051	1.51879	0.288038	11.676	-5.00635	1.40363	-2.22997	-0.710218	1.24996	-1.68566	-10.0183	4.0503	21.5492	-9.76496	113.462	5.74229	10.5006	-0.446174	-26.2081	-4.01634	-12.8457	42.0188	-3.91929	9.34344	-12.3935	-86.539	-19.0047	-19.3561	0.908181	3.08212	-7.0464	49.1994	-3.58581	-1.55433	-43.7421	-0.918248	-10.641	4.66962	-6.00471	-3.69524
BIOCHEM	-2.76813	-14.3648	-1.7073	-20.5967	70.0842	-10.6961	-3.00324	0.295577	-3.57005	-2.36049	-4.48768	-1.83633	-10.8424	1.02941	-8.22519	-7.47845	-3.1139	-1.63877	7.14791	-17.8723	16.1231	13.9067	-13.3135	29.0088	-1.34783	0.653471	-4.09569	-43.118	-5.85399	7.30678	30.7739	-4.81925	7.73813	-15.5886	-118.479	-24.6172	-25.3629	3.76787	-1.43876	28.8985	-3.89211	-22.352	-5.62759	-50.409	-6.5693	-13.9125	18.2225	-5.35866	9.68231
CHEM	-0.680402	-9.20665	-2.92929	-12.5946	5.02953	-4.02658	0.879878	35.6455	-5.16022	0.0474521	-3.703	-1.0517	-7.52271	-3.02672	-5.38147	-4.01004	-0.979436	-1.22491	-1.06674	-7.79446	-5.00085	-3.26142	-1.74123	-15.5228	-0.749528	-1.53896	-2.71434	-24.6866	0.699624	3.01829	13.7692	-2.22628	21.9509	-7.1889	-46.4582	-6.33701	-8.75311	-4.8235	0.114981	145.228	-3.05237	7.16821	-2.76636	-23.7928	-4.14963	-2.55271	1.8317	1.3028	5.26498
CLINIC	-10.5126	-33.2196	-14.2762	25.4177	-57.2352	55.321	-17.9181	-47.8032	-20.8611	-4.76055	-16.3521	-3.2595	-23.4455	-7.361	-22.2464	-12.1621	-4.60299	-7.04386	-7.00697	7.63177	-16.4645	-22.3328	28.8709	-69.4117	-4.60229	-12.0227	-5.99989	52.0217	-6.59852	-28.7432	-31.7879	5.30095	1.44577	3.80954	131.602	4.08312	30.2996	-2.24668	-4.16417	-24.063	-19.3216	-27.4985	6.97313	44.6333	-3.1074	10.6045	-15.7849	-11.1733	-9.52147
CS	50.8729	0.515064	-5.42053	-18.9697	-48.3549	41.9859	19.7016	21.622	13.5288	21.7872	31.8451	2.22331	10.3647	52.4281	65.4682	56.378	19.7666	20.9836	30.5866	-8.84104	2.03734	11.6027	2.47881	-3.18503	11.3096	9.73993	8.65166	-30.9455	7.7791	113.771	-1.38046	-3.79609	-4.31109	-10.0819	-68.0592	-10.4695	-3.27409	9.75797	-0.498791	3.07031	-3.25592	57.7643	-2.63658	-30.7789	13.0727	5.28613	28.4496	71.1644	19.4225
ECO	-3.45968	78.5519	24.8513	1.09633	-5.73292	-8.81912	-3.67357	38.7451	20.7598	-0.388107	9.10579	6.48623	24.2618	-3.05889	42.4364	18.911	9.52162	11.553	-1.33557	-5.29641	11.4399	27.8866	-9.00159	99.2895	3.92674	8.97185	7.95494	-24.1409	-2.07975	-3.32806	10.6187	-2.92115	0.934631	-6.57711	-49.0897	-12.4509	-14.2713	3.78546	-1.11232	-16.274	46.6755	14.5655	-2.22664	-26.5483	16.3929	-6.96995	-5.04504	-3.06697	-1.78561
ENG	28.2604	-9.67401	-2.1172	-12.2316	5.2041	3.13444	35.0534	46.1278	-6.56108	3.80577	-0.890535	-1.15236	-8.82282	8.06654	-2.73679	-0.53306	-0.11372	-3.05467	0.298306	-9.76336	-4.94651	-5.91537	17.8864	-15.2466	6.24947	1.14989	1.03221	-25.9895	1.10183	54.1257	-0.820442	-2.27126	15.4922	-8.6998	-50.3184	-10.7241	-13.0469	-4.59599	-1.10162	61.4015	-2.37697	33.2613	-2.7762	-28.316	-4.5343	-5.94682	0.249578	27.4258	20.8572
ENVIRON	-1.75239	9.71389	0.406333	-3.69033	-8.92272	-20.6292	22.8665	20.2801	-6.11926	-2.3249	-0.951006	1.66235	-1.3615	-1.40331	-3.16601	-1.12744	-0.575142	-3.1323	-1.02709	7.99979	-5.49047	-5.13702	-4.60285	-12.6068	-1.55958	-0.211712	0.736731	1.34372	-1.44176	-7.87594	8.958	-1.14037	6.1498	14.0216	17.1768	20.917	8.33208	-1.91479	-0.222386	13.6061	4.01722	-0.797002	0.144886	-19.7003	2.05444	7.1484	12.9047	0.246893	-2.20012
EPIDEM	-8.44892	9.54541	-7.155	-8.42568	-70.4989	-44.681	3.30756	-1.61238	-10.3696	-3.76549	-6.2203	2.46552	10.9297	-11.1783	-6.83644	-6.62562	0.695197	1.12791	-5.73033	49.7424	-9.4549	3.77734	-5.48438	-26.1129	-1.07081	-5.87547	-2.46263	54.699	-2.33776	-26.5792	-12.5956	8.41545	-15.1637	18.5466	133.886	24.5679	76.7957	-2.78351	-0.159094	-63.2615	-1.87889	-12.3005	2.20273	3.68178	5.68183	18.1466	0.97331	-11.1448	-5.80379
IMMUN	-5.05565	15.3037	-0.626899	-16.0187	-13.1567	-1.48593	-0.326822	-2.28906	8.49876	-1.34924	-0.146553	0.730307	3.65912	-3.34996	7.16295	0.112067	-0.0850279	4.02408	-1.82713	9.333	1.49917	17.7229	-5.52356	66.1466	-0.815583	-2.12349	-1.83373	1.98343	-4.41734	-6.84403	1.3049	1.20166	-3.29285	5.24244	11.4623	-14.2993	-16.749	4.73884	-1.78634	-18.7842	1.15316	-20.2491	-0.331982	-14.8158	12.1644	-7.81235	-4.77005	-3.83558	-1.33425
NEURO	-2.41794	-13.857	-8.48722	36.2889	102.606	-13.4115	9.61593	35.3216	13.7946	4.52447	17.786	-0.197854	5.00384	-2.46336	-2.34931	-2.63115	-1.81605	-4.85163	-2.72858	-14.7684	6.65371	-12.0727	2.11111	-23.1015	-2.96031	12.8274	-2.75259	-32.657	0.0102959	-0.337157	-5.30189	-4.68538	0.84986	-13.4843	-88.2838	-14.1896	-28.1076	-6.78556	-0.0812262	26.5566	-11.5586	25.7488	-1.72276	-45.8912	-8.46085	-10.0696	-8.39714	-7.70077	-2.06326
ONCO	-4.19734	-16.7929	-8.57798	-25.2914	-52.8366	47.6999	-15.8909	-31.9461	-13.3092	-4.08098	-11.0311	-2.54998	-18.8456	-2.32946	-16.8819	-11.6798	-5.4483	-4.87793	-2.13769	-12.2067	-0.802225	-13.212	-9.9007	-42.8862	-2.65759	-8.44781	-4.49723	6.01456	-6.93228	-11.5568	-8.31621	0.991437	-14.6099	22.6408	74.9944	-20.1022	-22.5889	-0.18417	-3.30084	-18.7308	-10.8787	-37.2959	-2.64005	202.906	-8.57657	-9.37997	-7.45396	-6.0142	-4.7226
PHYSIO	-3.05274	-9.13724	-3.26946	18.7298	46.4896	0.530624	6.88375	-4.80938	-4.58094	-1.53071	-5.46689	-1.08445	-8.32548	-2.1969	-7.32933	-6.14889	-1.73649	-4.62583	-1.60912	-6.54356	-4.83458	-6.44306	18.8333	-19.3168	-0.789039	-1.68456	-2.09946	-11.7029	-1.32552	-8.72702	-7.08739	-1.89943	32.6633	-5.14138	-11.0459	-4.30028	-8.71479	-4.27821	-1.42744	17.6741	-5.69907	-6.87457	2.11218	-20.7516	-4.46386	1.3813	-1.52887	-5.32853	-1.25141
POPGENE	-2.57423	-9.72497	-4.80232	-6.79115	-30.0129	-18.698	-8.16795	-17.2909	6.30155	1.01292	2.26078	-0.135185	-3.55812	0.816112	1.30777	6.98064	0.0755979	5.71336	-0.725466	-7.27915	11.5288	-0.345286	-7.28772	-14.0743	-1.32933	0.0510871	18.8233	8.25843	16.5582	-0.622957	-4.72447	8.4965	-5.64362	11.522	-7.71953	-9.84399	-15.1318	10.9664	-0.304998	-22.1592	-4.48969	13.6193	-2.17781	-17.9194	-0.725744	-5.40423	-1.59555	-4.48555	-1.40665
PSYCH	-4.96282	5.5144	-7.09418	33.4543	38.7505	-30.7525	-7.01249	-13.2903	34.7915	0.639443	5.16318	1.28989	34.0748	-5.53624	-2.86036	-2.00026	-1.98003	-3.94339	-3.36434	-3.63178	5.28542	-8.48713	-11.5273	9.49547	-1.75668	1.33873	4.71059	15.6121	22.6419	-14.3789	-6.45663	-4.41845	-20.275	-9.19009	-30.5879	87.2038	-3.43653	-3.41908	15.3195	-5.79346	-7.78733	37.9275	6.54091	-35.5964	0.106853	17.1842	-9.76973	-7.15099	-4.33415
[truncated: 171 more columns]
