# Supplementary material for: Educating the future generation of researchers: A cross-disciplinary survey of trends in analysis methods
Source: PLoS Biol. 2021 Jul 29;19(7):e3001313. doi: 10.1371/journal.pbio.3001313 (PMC8321514; doi:10.1371/journal.pbio.3001313)
Supplement: S4 Data — Excel spreadsheet containing results from the “method grouping” tensor decomposition analysis in 2 tabs: (1) the analysis method weights for all 20 components; and (2) the discipline weights for all 20 components. (XLSX) [file pbio.3001313.s008.xlsx]

## Sheet: Component_Weights_Discipline
Discipline	Comp1	Comp2	Comp3	Comp4	Comp5	Comp6	Comp7	Comp8	Comp9	Comp10	Comp11	Comp12	Comp13	Comp14	Comp15	Comp16	Comp17	Comp18	Comp19	Comp20
NEURO	0.111778	0.171484	0.0885617	0	0.153534	0.022108	0	0.10044	0.010982	0.0802093	0	0.228854	0.200205	0.166895	0.142037	0.146794	0.832588	0.192575	0.215502	0.145515
CLINIC	0	0.312806	0	0.237949	0.358743	0.0290835	0.0100438	0.38357	0.0497161	0.0306342	0.00631948	0.383709	0.0983024	0.3115	0.216943	0.0567964	0	0.435276	0.142459	0.1818
EPIDEM	0	0.268503	0	0.425797	0.420669	0.13807	0	0.179918	0.0274211	0.00334593	0.121893	0.333896	0.137277	0.193227	0.129608	0.0360097	0	0.465921	0.145924	0.132297
BIOCHEM	0.150033	0.120617	0.43724	0	0	0.309008	0.105094	0.211826	0.116494	0.115902	0.156282	0.216274	0.197159	0.164307	0.156071	0.0121662	0.0966517	0.0661485	0.310829	0.293325
IMMUN	0.324485	0.249242	0	0.265884	0	0.463132	0	0.353696	0.0429356	0.234703	0.152381	0.219126	0.156221	0.0478893	0.157372	0	0	0	0.249707	0.242945
PSYCH	0.132035	0.241596	0	0.0215402	0.676766	0.0152449	0.0331039	0	0.000718979	0.142955	0	0.23169	0.136031	0.178984	0.121355	0	0.261764	0.413954	0.127129	0.0885957
POPGENE	0.3004	0.1603	0	0	0.0769213	0.220467	0.841084	0.108706	0	0.140942	0	0.288047	0.167558	0.0825641	0.144488	0	0	0.0845825	0.189327	0.119644
CS	0.0791004	0.392472	0.70466	0.0131552	0.147945	0.069176	0.0419387	0.0607596	0.000374935	0.0581495	0.0164318	0.185021	0.280219	0.0732442	0.261251	0.381273	0.0390431	0.175097	0.199679	0.110714
ONCO	0.247106	0.175178	0.0473072	0.026813	0.0818093	0.0527228	0.139628	0.706682	0.0874535	0.179265	0	0.321034	0.100319	0.0221072	0.247073	0	0	0.0755255	0.224097	0.222579
ENVIRON	0.303841	0.142508	0	0.612325	0.350996	0.0782379	0	0	0.13513	0.218209	0.0360472	0.118701	0.208059	0.144211	0.198567	0	0	0.123133	0.206852	0.195044
ENG	0.252834	0.0827899	0	0	0	0.246008	0	0.0638639	0.154563	0.332543	0.0162655	0.00778754	0.30454	0.263607	0.339967	0.735015	0	0	0.277558	0.263275
CHEM	0.296632	0.0727913	0	0	1.98143e-05	0.228333	0	0	0.792962	0.338532	0	0	0.357579	0.083199	0.357332	0	0	0	0.285754	0.325066
ECO	0.244713	0.310552	0	0	0	0.368316	0.0642006	0	0.0771581	0.133655	0.713543	0.0963651	0.279671	0	0.124115	0.00600917	0	0	0.214832	0.117807
ANIMAL	0.160919	0.185876	0.000127187	0.018623	0.037771	0.297401	0.0531126	0.0782602	0.123065	0.0968864	0.60741	0.189432	0.194388	0.137573	0.138761	0.0065129	0	0.091788	0.285973	0.312744
PHYSIO	0.44477	0.0410894	0	0	0.167527	0.11848	0	0.0176222	0.129256	0.628271	0	0	0.156378	0.641884	0.0517271	0	0	0	0.190712	0.17162

## Sheet: Component_Weights_Methods
Entity	Comp1	Comp2	Comp3	Comp4	Comp5	Comp6	Comp7	Comp8	Comp9	Comp10	Comp11	Comp12	Comp13	Comp14	Comp15	Comp16	Comp17	Comp18	Comp19	Comp20
adaboost	0	0	0.0393268	0	0	0	0	0.00254464	0	0	0	0	0	0	0.109435	0.0767124	0	0.0159594	0.0163088	0
akaike information criterion	0.111076	0.114653	0.0449918	0.117939	0.13595	0.140612	0.0470302	0.0964065	0.0628241	0.010631	0.154092	0.00671985	0.0585807	0.0189915	0	0.0410269	0.0789313	0.000813315	0	0
analysis of similarity	0	0	0	0.00201979	0	0	0	0	0	0	0.10898	0	0	0	0	0	0	0.00118771	0.0761479	0.0230735
ancova	0.106817	0	0.00449229	0.0241411	0.0958306	0	0.0469789	0.0590481	0	0	0.101747	0.00781526	0	0.178611	0	0	0.107512	0.0597067	0.0594404	0.00698533
anova	0.0871643	0.0347517	0.0823723	0.0764642	0.134992	0.0641452	0.1031	0.0807183	0.158809	0.313649	0.165879	0.184144	0.053309	0.0900281	0.0212434	0.0810823	0.155023	0.0344502	0	0.252204
area under the curve	0.113694	0.0501912	0.115042	0.0531574	0.0422432	0.0476969	0.0628345	0.150555	0.10257	0.0984315	0.0912982	0.110524	0	0.104851	0.212593	0.0896425	0.0856457	0.0558144	0	0.0681531
arma/arima	0.077158	0.0405839	0.0457218	0.125109	0	0.00587996	0	0	0.0511496	0	0.0248158	0	0	0.0608276	0	0.135572	0.0669049	0.0429092	0.0366438	0
autocorrelation/cross-correlation	0.0812894	0.114434	0.0590426	0.158844	0.0487621	0.0435828	0.00962963	0.0316411	0.153191	0	0.147904	0	0.11361	0.0654707	0.00227247	0.134298	0.129503	0.00311476	0.0319299	0
bayes factor	0.0407815	0.12569	0.0406947	0	0.0063531	0.0872995	0.0541468	0	0	0	0.0313619	0	0	0	0	0	0.076669	0.0790141	0.0271623	0
bayes rule	0	0.025177	0.0293802	0	0	0	0.000663698	0	0	0	0	0	0	0	0	0.0218576	0.0153604	0.0105142	0.00890209	0
bayesian estimation - general	0.0416705	0.179195	0.0653654	0.0378919	0.027709	0.0604332	0.0544995	0.0122239	0	0	0.0324334	0	0	0	0.00800377	0.0466976	0.0759629	0.046936	0.0426715	0
bayesian hierarchical model	0	0.0290956	0	0.00158192	0	0	0	0	0	0	0.00305568	0	0	0	0	0	0	0.0131257	0.00765331	0
bayesian information criterion	0.0944021	0.117216	0.0718387	0.0485247	0.142973	0.149927	0.0577794	0.0535481	0.0390046	0	0.0854254	0.00921274	0.00121636	0	0	0.0437238	0.093379	0.0324698	0.00219421	0
bayesian network	0.023603	0.0479223	0.0996475	0	0	0	0.0238832	0.0235695	0	0	0	0	0	0	0.0578936	0.0643722	0.0141894	0.0295934	0.041002	0
bayesian neural network	0	0.000171513	0.000883547	0	0	0	0	0	0	0	0	0	0	0	0.000226415	0.000595939	0	0	0	0
bayesian posterior	0.0673766	0.253469	0.0844604	0.0397683	0.0232745	0.0952903	0.0554239	0.00721227	0.0157146	0	0.0646916	0.00330914	0.0111386	0	0	0.0615245	0.0592127	0.0405747	0	0
bayesian prior	0.0453383	0.238531	0.0729162	0.0335557	0.00807014	0.0487183	0.0642744	0	0.0135863	0	0.0411884	0	0	0	0	0.0519944	0.0420731	0.0464664	0.00657953	0
bernoulli distribution	0.00733057	0.0837383	0.0355076	0.00155342	0	0	0	0	0	0	0.0100722	0	0	0	0	0.00817479	0	0.0365018	0.0248921	0
beta distribution	0.0228246	0.134528	0.0463336	0	0	0.0461249	0.0462531	0.00403237	0.00170684	0	0.0211576	0	0	0	0	0	0.00854391	0.0409814	0.0250675	0
biclustering	0	0	0.0494701	0	0	0	0	0	0	0	0	0	0	0	0	0.00223719	0	0	0.0279894	0
bilinear regression	0	0	0.000121078	0	0	0	0	0	0	0	0	0	0	0	0	0	0	0.000651934	0.00123623	0
binomial regression	0.0969854	0.0452541	0.00750393	0.134661	0.0144847	0.00314842	0	0.0589339	0	0	0.0413979	0	0	0	0	0	0.000264615	0.11937	0.00388767	0
binomial test	0.0471015	0	0.0415086	0	0	0.0278023	0.0608344	0.0539612	0	0	0.0546551	0	0	0	0	0	0.0647209	0.0726569	0.0620994	0
bionomial distribution	0.0946298	0.127146	0.0782623	0.0814857	0.000518604	0.0626898	0.0529222	0.0619353	0.0233815	0	0.112749	0.026833	0	0.0155667	0	0.0144433	0.0493361	0.0727303	0.0362309	0
bland altman analysis	0.0524419	0	0	0.00890846	0	0	0	0.0417908	0.0172528	0	0	0	0	0.149937	0	0.0410858	0.00094141	0.0366512	0.0438691	0
bootstrapping	0.111555	0.0419363	0.0916364	0.0637839	0.171283	0.244059	0.0752041	0.099202	0.0961333	0.0348315	0.140138	0.110722	0.127912	0.0552197	0.0990108	0.0419356	0.114684	0	0	0.0767184
box regression	0	0	0	0	0	0	0	0	0	0	0	0	0	0	0.0023469	0.00848309	0	0	0	0
branch and bound algorithm	0	0	0.00138799	0	0	0.0131867	0	0	0	0	0.00484959	0	0	0	0	0.00368135	0	0.00263875	0	0
canonical correlation	0.0138492	0	0.0255633	0	0.00404833	0	0.0181578	0	0	0	0.0553179	0	0	0	0.00393419	0.0271159	0.0551264	0.0552971	0.123418	0.0337126
chi square distribution	0.0689119	0.0374953	0.0196485	0.00258937	0.0229737	0.0195567	0.0788844	0.00621691	0	0	0.0184942	0	0	0	0	0.0104691	0.00678542	0.105163	0.000865884	0
chi square test	0.117204	0.00976731	0.0507666	0.119399	0.183157	0.0674435	0.12141	0.149586	0.0269797	0.0647956	0.0927288	0.152897	0	0.0999931	0.0139544	0.0232279	0.0755378	0	0.0599875	0.00325003
cholesky factorization	0.0224112	0.0153952	0	0	0.0220404	0	0.0517079	0	0	0	0	0	0	0	0	0.0198938	0.00845245	0.0815363	0.000792956	0
classification accuracy	0.0623761	0.0322662	0.123759	0.0147802	0.0113379	0.050758	0.0812357	0.0698471	0.0700949	0	0.0450223	0	0	0.0355327	0.187495	0.136559	0.0768455	0.0543449	0.0510903	0.0237594
cluster analysis - general	0.0342091	0	0.073569	0.0548941	0.0824211	0.0983951	0.054489	0.0709809	0.105534	0	0.0908687	0	0	0	0.00507816	0.0351837	0.0659082	0.0335845	0.130538	0.138629
cochran armitage test	0.0170133	0	0	0.00885411	0	0	0.0285566	0.0322394	0	0	0	0	0	0	0	0	0	0.045621	0.00290045	0
coefficient of variation	0.0841582	0.0348777	0.0676303	0.0904104	0.0227214	0.0433914	0.0570671	0.0861149	0.130683	0.0457221	0.102037	0	0.0133401	0.183714	0.000139261	0.0532876	0.062736	0.0216544	0.0429375	0.00253706
conditional logistic regression	0.0765218	0	0	0.0988876	0	0	0.0657202	0.0914854	0	0	0	0	0	0	0	0	0	0.0835179	0	0
confidence interval	0	0.0936551	0.0496731	0.167471	0.166337	0.093106	0.144908	0.120646	0.124107	0.364401	0.115214	0.286572	0.131951	0.0407162	0.0869409	0.0640938	0.0917231	0	0.0791457	0.00763
confirmatory factor analysis	0.0888847	0	0	0.0115224	0.204914	0	0.00606327	0	0.0639067	0	0	0	0	0.00234062	0	0.00339708	0.014237	0.0884464	0	0
content analysis	0.00939755	0	0.0106869	0.0284292	0.0324278	0.0191373	0	0.00963714	0.0137901	0	0.0133252	0	0	0.00266253	0	0	0	0.112885	0.0672557	0.00243545
contingency table	0.0732501	0.0135969	0.0599925	0.0192203	0.00597191	0.0305104	0.056036	0.0793516	0	0	0.0498214	0	0	0	0.0115616	0.00235965	0.016232	0.098315	0.0421616	0
contrast coding	0	0	0	0	0.00282327	0	0	0	0	0	0	0	0	0	0	0	0.00303103	0.0451594	0.0140357	0.000631463
correlation	0.0398358	0.00495116	0.0657645	0.116585	0.166315	0.0938225	0.144254	0.0985235	0.179845	0.297584	0.120482	0.226281	0.466477	0.0770746	0.116744	0.091192	0.115913	0	0	0.229745
correspondence analysis	0	0	0.00414753	0.0182699	0.00323772	0.0348665	0	0.0122718	0	0	0.136021	0	0	0	0	0.00181024	0	0.0420183	0.121988	0.0323123
covariance	0.08525	0.088662	0.0749808	0.0655078	0.175592	0.0361146	0.143842	0.0445676	0.161003	0.0376286	0.108705	0.0641524	0.199866	0.0688584	0.0176441	0.139913	0.109215	0	0.0214975	0.0667776
covariance estimation	0.0285206	0.0030049	0	0.0100685	0	0	0	0.0104417	0	0	0	0	0	0.0149347	0	0	0	0.0955978	0.00741627	0
cox regression	0.133458	0.0445059	0.0425993	0.101446	0.0141852	0	0.0645359	0.225315	0	0.0205695	0.0175107	0.0725386	0	0.000108693	0.0284016	0	0.00209606	0.115808	0.0222634	0
credible interval	0.0602989	0.210864	0.0158296	0.0372136	0	0.0355416	0.00693772	0.0095375	0	0	0.0241589	0	0	0	0	0	0.00124903	0.0669212	0	0
cronbach's alpha	0.0351579	0	0.000160236	0.00851156	0.0750261	0	0	0	0.0155807	0	0	0	0	0.026901	0	0	0	0.100489	0.0177103	0
dag	0.0503122	0.0126741	0.09221	0.0839821	0	0.00534982	0.0159552	0.0156156	0.00172861	0	0.00157268	0	0	0	8.20508e-05	0.015126	0	0.0706833	0.0654398	0
decision tree	0.019189	0	0.0779467	0	0	0	0.00225894	0.039446	0.0227769	0	0.0181979	0	0	0	0.210685	0.0986283	0	0.0571492	0.0693551	0
densitogram	0	0	0	0	0	0	0	0	0	0	0	0	0	0.00017258	0	0.0015144	0	0	0.000947743	0
density based clustering	0	0	0.0269712	0	0	0.00362172	0	0	0.00853624	0	0	0	0	0	0	0.0472794	0	0	0.0330984	0.00618143
detrended fluctuation analysis	0.0114924	0	0.00153582	0	0	0	0	0	0	0	0	0	0	0.0405518	0	0.0238677	0.0242456	0.00805974	0.0234408	0
deviance information criterion	0.0325611	0.194758	0	0.0446031	0.00137847	0.00160427	0	0	0	0	0.0289802	0	0	0	0	0	0.00245593	0.0589396	9.26571e-08	0
discourse analysis	0	0	0	0	0.00103821	0	0	0	0	0	0	0.00259538	0	0	0	0.000156911	0	0.00732058	0.00271059	0
discriminant analysis	0.0567346	0	0.0525125	0	0.0211708	0.0271119	0.0344118	0.0518175	0.0959906	0	0.115002	0	0	0.0285423	0.136144	0.0894811	0.0550601	0.0531567	0.10184	0.196982
distance metric	0.0719413	0.0114589	0.117461	0.0384077	0.065903	0.125833	0.0784657	0.0727915	0.115074	0	0.148082	0	0.0708512	0.0251148	0.0533915	0.127733	0.0895473	0.0263897	0.0572332	0.190156
dose response analysis	0.0106054	0	0.00200747	0.001454	0	0	0	0.0112721	0.000725359	0	0	0	0	0	0	0	0	0.0122111	0.0251271	0
dunnet test	0	0	0	0	0	0	0	0	0	0	0	0	0	5.85148e-05	0	0	0.00291019	0	0.00152176	0
dunns test	0	0	0	0	0	0	0	1.71548e-05	0	0	0	0	0	0.000284781	0	3.73774e-06	0.00012689	0.000909512	8.32999e-05	0
dynamic factor analysis	0	0.000895379	0.00274892	0	0.00140428	0	0	0	0	0	0	0	0	0	0	0.00208368	0	0.000250229	0	0
dynamic time warping	0	0	0.0162983	0	0	0	0	0	0	0	0	0	0	0	0	0.0740582	0.00702313	0	0.042777	0
effect size	0.0776006	0.0823855	0.0622751	0.0673651	0.18388	0.00767637	0.16189	0.0551908	0.0277606	0.174296	0.123489	0.158863	0	0.153286	0.017901	0.0255643	0.120369	0	0.0726671	0.0510049
elastic net regression	0.00679213	0	0.0399942	0.000566431	0	0	0	0.0158092	0	0	0	0	0	0	0.0285989	0	0.00520926	0.023038	0.0289768	0
em optimization	0.000851037	0.00902797	0.010368	0	0	0	0.0214684	0.00278685	0	0	0	0	0	0	0	0.00403798	0	0.0551325	0.0103464	0
empirical bayes	0.0397432	0.0642978	0.089443	0.0171647	0	0.0944786	0.0667426	0.0789537	0	0	0.032816	0	0	0	0	0	0.0233654	0.044677	0.0913992	0
empirical orthogonal function	0.00203945	0	0	0.00354608	0	0	0	0	0.000240449	0	0	0	0	0	0	0.00341482	0	0	0.014108	0
entropy	0.00991462	0	0.0507411	0	0	0	0	0	0.018683	0	0	0	0	0.00343605	0.00451704	0.0688407	0.0227075	0.0129631	0.0407004	0
expectation maximization optimization	0.0743966	0.048675	0.112926	0	0.0876452	0.0762664	0.117983	0.0633563	0.0361088	0	0.0226292	0	0	0	0	0.0944311	0.0517711	0.0662557	0.0306206	0
exploratory structural equation model	0	0	0	0	0.00588599	0	0	0	0	0	0	0	0	0	0	0	0	0.00692051	0	0
exponential distribution	0.0339451	0.116803	0.0355105	0	0	0.0432483	0.000585063	0.0169476	0.0268774	0	0.00819671	0	0	0	0	0.0356534	0.0187896	0.0475317	0.0191526	0
factor analysis	0.0717717	0.0157874	0.0626688	0.0802295	0.226221	0.0163241	0.0542491	0.0613658	0.132438	0	0.0734561	0	0	0.0385438	0	0.0451637	0.0756725	0	0.0814892	0.0529914
fishers exact test	0.0511094	0	0.0403553	0.0273109	0	0.0461698	0.0578505	0.16077	0	0	0.0216884	0	0	0.0297	0	0	0.0131517	0.0744832	0.080539	0.000947292
fishers least significant difference	0.0528086	0	0	0	0	0	0	0.0233864	0.0127594	0	0.051169	0	0	0.104457	0	0	0.0362624	0.0514611	0.108832	0.0155624
fixed effect model	0.129636	0.0583847	0	0.0665143	0	0	0.120161	0.0812394	0	0	0	0	0	0.00967129	0	0	0.0458219	0.133366	0	0
fixed effect regression	0	0	0	0.000176219	0	0	0	0	0	0	0	1.59689e-05	0	0	0	0	0	0.00205264	0	0
fourier analysis	0.0401746	0	0.0489406	0	0	0.0727983	0	0.0138895	0.187383	0	0.0239191	0	0.031532	0.12279	0.00351596	0.169709	0.124238	0.05027	0.0593718	0.0181815
framework analysis	0	0	0	0.00470754	0	0	0	0.00023108	0	0	0	0.00244765	0	0	0	0	0	0.0410319	0	0
fuzzy c mean algorithm	0	0	0.0281474	0	0	0	0	0.0118845	0	0	0	0	0	0	0.00510129	0.0575333	0	0	0.0498254	0.00223312
gamma distribution	0.0577746	0.16519	0.0438716	0.0371901	0	0.187517	0.0135303	0.0151516	0.0253491	0	0.0660158	0	0	0	0	0.0294815	0.0370304	0.0687638	0.00981198	0
gaussian distribution	0.0539772	0.0949983	0.0870664	0.0951736	0.121777	0.0545959	0.12092	0.0860674	0.142379	0.146932	0.11326	0.114142	0.207714	0.132771	0.00786191	0.117752	0.0916257	0	0.0419083	0.0289997
gaussian process	0	0	0	0	0	0	0	0	0	0	0	0	0	0	0.00176947	0.00146079	0.00332123	0.0019478	0.00101813	0
gaussian process regression	0.0277435	0.0935536	0.0361516	0.101752	0	0	0	0	0.0866205	0	0.0297837	0	0	0	0.0131288	0.11764	0.0252029	0.0180112	0.0496032	0
generalized estimating equations	0.0688112	0.000404423	0	0.072387	0	0	0.0266528	0.0476981	0	0	0	0	0	0.00288852	0	0	0.00443261	0.138036	0.0110708	0
generalized linear model	0.0844259	0.0841137	0.0806068	0.110004	0.0202604	0.0227141	0.0733094	0.070219	0	0	0.137576	0.00927648	0	0.0228937	0.0334202	0.0109748	0.0686184	0.0568854	0.0469542	0
generalized/weighted least squares estimation	0.0996188	0.0430367	0.0204035	0.0310829	0.120912	0	0.0300968	0.0134399	0.0312742	0	0.0815147	0	0	0	0	0.0423339	0.035639	0.0790126	0.0233956	0
genetic algorithm	0.0135253	0.00787209	0.072697	0	0	0.0776273	0	0	0.112168	0	0.0175731	0	0	0	0.0739302	0.114458	0.0108744	0.0106298	0.0459019	0
geometric mean	0.0978956	0.012073	0.071137	0.154879	0.00625054	0.0454315	0.0144539	0.097708	0.0312474	0	0.0524865	0	0	0.0527934	0.00231839	0.0164002	0.0283885	0.0362917	0.0769986	0.00731792
goodness of fit	0.113439	0.0948788	0.0576932	0.0830516	0.175308	0.0413871	0.0701931	0.105149	0.136938	0.0192659	0.0931802	0.00965869	0.0246917	0.0371281	0.0116307	0.0436451	0.07015	0	0	0
gradient boosting	0.0146976	0.00442758	0.0560571	0	0	0	0	0.0130272	0.0037761	0	0	0	0	0	0.18422	0.0352362	0	0.0466891	0.0322293	0
gradient descent	0.00680934	0.0079524	0.0786538	0	0	0	0	0.00779291	0.0399191	0	0	0	0	0	0.0630534	0.137038	0.0360085	0.0232571	0.0297219	0
granger causality	0.000214152	0.0040319	0.0158852	0.01147	0	0	0	0	0.0149761	0	0	0	0	0	0	0.0173522	0.100928	0.0256436	0.0460355	0
graph theory	0	0.0364578	0.128912	0.0130654	0	0.0285495	0.0252582	0.0351295	0.0237846	0	0.0217155	0	0	0	0	0.0574373	0.100097	0.0168405	0.136538	0.0287756
graph theory - centrality	0	0	0.0780165	0	0	0	0.00560613	0.0314823	4.19536e-05	0	0.0388883	0	0	0	0.00298677	0.00373049	0.0786224	0.0458176	0.1323	0.0485438
graph theory - community detection	0.00634329	0	0.110805	0	0	0.00373427	0	0	0.000767952	0	0.0679216	0	0	0	0	0.0250525	0.0865114	0.0263666	0.115691	0.0310299
graph theory - network statistic	0.00327414	0	0.079488	0	0	0	0	0.0159313	0	0	0.0412707	0	0	0	0	0.0219627	0.114145	0.0282919	0.116816	0.0202055
graph theory - social network	0	0.00204015	0.0188386	0.00454654	0	0	0	0	0	0	0.00189653	0	0	0	0	0.00724579	0	0.0436734	0.0224545	0.00356136
graphical model	0	0.043072	0.0922626	0	0	0	0.0182122	0	0	0	0	0	0	0	0	0.0442516	0.0146483	0.0349978	0.0309566	0
grounded theory	0	0	0	0.00979151	0	0	0	0	0	0	0	0.0046912	0	0.000450188	0	0	0	0.0821198	0.00278527	0.000944745
growth curve model	0.0070971	0.00389377	0	0	0.0358595	0	0	0	0	0	0	0	0	0	0	0	0.00558475	0.0964057	0	0
harmonic mean	0.010226	0.0393023	0.0495289	0	0	0.0314277	0	0	0	0	0.0306022	0	0	0	0.0388554	0.0526109	0.0117891	0.0238332	0.0460846	0
hash function	8.41224e-34	0	3.11579e-35	0	0	0	0	0	2.93163e-34	0	0	0	0	0	3.33601e-35	3.19301e-35	3.92244e-35	1.66895e-34	0	0
heteroscedasticity test	0.00201819	0	0	0.00603319	0	0	0	0	0.00656972	0	0.00164499	0	0	0.000930701	0	0	0	0.0473934	0.00713307	0
hierarchical bayesian model	1.1329e-05	0.0627453	0.0209639	0	0	0	0.00693759	0	0	0	0	0	0	0	0	0.00475188	0.0146617	0.0186325	0.0216298	0
hierarchical clustering	0.0773719	0	0.135181	0.0329164	0.0392521	0.132099	0.103898	0.12424	0.122392	0	0.110865	0.0117926	0.00391393	0.0188048	0.04112	0.0463	0.0729634	0.0316593	0.0841061	0.249916
hilbert transform	0	0	0.00614462	0	0	0	0	0	0.00300411	0	0	0	0	0.0198826	0	0.0668466	0.101377	0	0.0401203	0
hotelling's t	0	0	0.0038748	0	0	0	0	0	0.0270816	0	0	0	0	0.00189676	0	0	0.00383739	0.014287	0.0383018	0.00685258
hurdle regression model	0	0	0	0.00330051	0	0	0	0	0	0	0	0	0	0	0	0	0	0.0104917	0	0
hypergeometric test	0.0218138	0	0.115609	0	0	0.0374676	0.0736684	0.0777668	0	0	0.0317501	0	0	0	0	0	0.0127685	0	0.160675	0.0405877
ica	0	0	0.0391433	0	0	0	0.00319989	0	0.0192943	0	0	0	0	0.0163114	0	0.0936965	0.160661	0.0235519	0.0761333	0.000458424
interpolation	0.0531716	0.0201247	0.0262808	0.0213374	0	0	0	0.0176299	0.058313	0	0.00910709	0	0	0.0670542	0	0.0959575	0.0655492	0.0533997	0.0555932	0
intraclass correlation	0.121347	0.0240023	0	0.0722827	0.106979	0	0.016848	0.0690843	0	0.013998	0.0108456	0	0	0.208294	0	0.0275282	0.0431758	0.0375638	0.0163964	0
jackknife resampling	0.0532228	0.00784521	0.0370116	0.00925168	0	0.0341995	0.0220304	0.0301569	0	0	0.108418	0	0	0	0.0497875	0.0118011	0.0387667	0.0702156	0.0645804	0
k mean clustering	0.00268304	0	0.110189	0.0150249	0.0284374	0.049876	0.030043	0.0559987	0.0439571	0	0.0346932	0	0	0	0.0171502	0.0897388	0.0673686	0.0208197	0.153062	0.0539527
kalman filter	0.00413633	0.0268178	0.00480687	0	0	0	0	0	0.0137638	0	0	0	0	0	0	0.160191	0.0295619	0.0154833	0.0320398	0
kaplan meier analysis	0.0124931	0	0	0	0	0	0	0.149973	0	0	0	0	0	0	0	0	0	0.0398067	0.0354352	0
kl divergence	0	0.0350787	0.0801235	0	0	0.00259353	0.00914378	0	0	0	0	0	0	0	0	0.0491191	0.0264807	0.0129023	0.0438505	0
knn	0	0	0.0486984	0	0	0	0	0.0158564	0.0123487	0	0	0	0	0	0.126752	0.0784816	0	0.00855481	0.0649427	0
kolmogorov-smirnov test	0.076392	0	0.0555582	0.0280135	0.0232622	0.0162531	0.0271682	0.0855457	0.00134378	0	0.0301203	0	0	0.176558	0	0.018171	0.0513607	0.0520621	0.0776375	0.00455974
kruskal wallis anova	0.0778423	0	0.0238399	0.0747978	0.0022452	0.0182967	0.0279448	0.14812	0	0	0.0920447	0.00107788	0	0.125902	0	0.00457253	0.0553166	0.0476155	0.10639	0.0706978
kurtosis	0.0927509	0.00974487	0.0285937	0.0208641	0.171381	0	0.0534765	0.0487867	0.10138	0	0.0370226	0	0	0.0977606	0	0.113837	0.0645128	0.0339628	0.0207825	0
label propagation	0	0	0.033787	0	0	0	0	0	0	0	0	0	0	0	0.00324789	0.00332586	0	0.000554924	0.00974847	0
lasso regression	0.0556097	0.0199842	0.0744409	0.0197375	0.00119526	0	0.0394152	0.090046	0	0	0	0	0	0	0.0976972	0.0151265	0.0301096	0.072767	0.048315	0
latent class model	0.0377048	0.0420426	0.0036734	0.00668062	0.0632101	0.00261515	0.00611471	0.00918659	0	0	0	0	0	0	0	0	0	0.110539	0	0
latent dirichlet allocation	0	0.00753972	0.0338522	0.00459975	0	0	0	0	0	0	0	0	0	0	0.00188163	0.0102523	0	0.0145069	0.00793677	0
latent gaussian model	0	0.000366921	0	0	0	0	0	0	0	0	3.37355e-06	0	0	0	0	0	0	0	0	0
likelihood ratio test	0.117588	0.105614	0.0719022	0.0998763	0.130959	0.129312	0.123413	0.11989	0.0193575	0.0707434	0.133609	0.105185	0	0.0233745	0.0156258	0.0372528	0.0685512	0.0257183	0.0101795	0
linear regression	0.0410462	0.0387802	0.060354	0.150963	0.160497	0.0527009	0.155403	0.0858357	0.162752	0.280464	0.129256	0.246722	0.298251	0.0692699	0.115739	0.0881827	0.12013	0	0.0302411	0.0959734
lineweaver burk plot	0.0889965	0	0.00661352	0.0413529	0.0915723	0	0.0335453	0.0108853	0	0	0	0	0	0.00318266	0	0	0.0632995	0.130838	0.00329012	0
linkage disequilibrium plot	0.0129003	0	0	0	0	0	0.043362	0.00466882	0	0	0	0	0	0	0	0	0	0.00847407	0.00781598	0
listwise deletion	0.0213331	0	0	0.00423559	0.0791785	0	0	0.000234141	0	0	0	0	0	0	0	0	0.00174182	0.124589	0	0
log normal distribution	0.00492398	0.018766	0.000901014	0.00852138	0	0.00455906	0	0	0	0	0.00430681	0	0	0	0	0	0	0.0209605	0.00908108	0
log rank test	0.0833084	0.0017533	0.0442472	0.0225117	0	0	0.0130797	0.247655	0	0	0.00962534	0.0133904	0	0.0121815	0.00172528	0	0	0.0694033	0.0652415	0
log-binomial regression	0	0	0	0.000399481	0	0	0	0	0	0	0	0	0	0	0	0	0	0.00216539	0	0
log-transform	0.0709926	0.000233179	0.0168716	0.0647766	0.0134631	0	0.0115818	0.0515137	0.025709	0	0.0368797	0	0	0.0700289	0	0.00877486	0.0254972	0.0788187	0.0600963	0
logistic regression	0.100911	0.0873076	0.0699216	0.171651	0.147061	0.0641784	0.163791	0.126383	0.0354513	0.14398	0.0859215	0.28603	0	0.0541802	0.169792	0.0838462	0.0674298	0	0.0433356	0.00567456
lorentizian distribution	0	0	0	0	0	0	0	0	0.0070052	0	0	0	0	0	0	0	0	0	0	0
manhattan plot	0.012352	0	0.00641264	0	0	0	0.134833	0.0114077	0	0	0.000270607	0	0	0	0	0	0.00863582	0.0307982	0.0620727	0
mann whitney u	0.111674	0	0.0752011	0.0712588	0.0402278	0.0428788	0.0510116	0.168835	0.00493181	0.0381197	0.0975217	0.0765334	0	0.154932	0.0395963	0.0275025	0.0866213	0.0458855	0.0705316	0.0950579
manova	0.0596107	0	0.00801579	0.00588779	0.0929942	0.00711236	0.0180854	0.0152297	0.00777988	0	0.165734	0	0	0.0877898	0.00720115	0.00635733	0.0641013	0.0436404	0.128554	0.0907788
mantel test	0	0.0022748	0	0	0	0.0626217	0.0252416	0	0	0	0.158556	0	0	0	0	0	0	0.00807537	0.106202	0.000746807
markov chain monte carlo	0.0692225	0.20832	0.084584	0.0706306	0.0474488	0.18541	0.0908022	0.0256995	0.0422066	0	0.122024	0.0452185	0.0654668	0	0	0.0450039	0.0353177	0.0449539	0.0205469	0
markov model	0.0317869	0.0639629	0.0799704	0	0	0.127209	0.0572495	0.0292882	0.016588	0	0.00753614	0	0	0	0.00565571	0.090307	0.00671899	0.0480866	0.0408528	0
markov regression	0	0.000186203	0.000610807	0	0	0	0	0	0	0	0	0	0	0	0	0.000114323	0	0.000704101	0	0
maximum likelihood	0.073012	0.0835494	0.0785267	0.07867	0.203895	0.217288	0.122094	0.0639802	0.0924089	0.0742891	0.130316	0.12052	0.237994	0.0280684	0	0.0779779	0.0847243	0	0.0285302	0
mcnemar test	0.025082	0	0	0.00917218	0	0	0	0.0650916	0	0	0	0	0	0.0299555	0.0114205	0	0	0.0666844	0.0184924	0
mds	0.0325004	0	0.0545718	0.0128996	0.0109696	0.0584861	0.0895189	0.0312525	0	0	0.179393	0	0	0	0.00749223	0.0154507	0.039487	0.0470524	0.14652	0.116508
mean imputation	0	0	0	0	0.0165442	0	0.00432495	0.00734892	0	0	0	0	0	0	0.00163531	0.00318907	0	0.095809	0.0075228	0
mean squared error	0.076333	0.0604149	0.0634168	0.0352477	0.0761032	0	0.01168	0.0111049	0.108484	0	0.0375602	0	0	0.00851023	0.0795107	0.128312	0.0458035	0.0639642	0.0155041	0
median imputation	0	0	0.00286417	0	0	0	0.000407467	0	0	0	0	0	0	0	0.00128273	0.000461986	0	0.0138478	0.00209297	0
median test	0	0	0	0	0	0	0	0	0	0	0	0	0	0	0	0	0	0.00123892	0	0
mediation analysis	0.00200462	0	0	0.000350042	0	0	0	0	0	0	0	0	0	0	0	0	0.00302564	0.0266458	0.00232695	0
meta analysis	0.160714	0.0864695	0.0605235	0.0994561	0.0726683	0.0150907	0.184323	0.117306	0.00183767	0.0324782	0.0375324	0.107443	0	0.0472619	0.0270095	0.0115387	0.093622	0.0701246	0.0216624	0
meta-learning	0	7.17328e-06	0.00212086	0	0	0	0	0	0	0	0	0	0	0	0.00248524	0.00115197	0	0.00148786	0	0
method of moments	0.042097	0.04253	0.0147311	0.00549238	0	0	0.0181923	0	0	0	0	0	0	0.000125952	0	0.00536203	0	0.071509	0.0194668	0
mixed anova	0	0	0	0	0	0	0	0	0	0	0	0	0	0.0192842	0	0	0.00638542	0.010991	0.00776011	0
mixed effect model	0.110772	0.112132	0.0435972	0.0801146	0.0745094	0.0251185	0.117303	0.065342	0.0159723	0.0434195	0.143091	0.0427405	0	0.106677	0	0.0141724	0.0972285	0.0398864	0.0331745	0
mixture model	0.0311602	0.068088	0.0803342	0.010611	0	0.01928	0.0411094	0.0202251	0.0395782	0	0.0201077	0	0	0	0	0.0987095	0.0409513	0.0470261	0.0602405	0
moderation analysis	0.0140608	0	0	0	0.0287428	0	0	0	0	0	0	0	0	0	0	0	0.0173415	0.0931342	0.00237289	0
monte carlo method	0.0785442	0.0705136	0.0234451	0.0364973	0.0401745	0.0450406	0.0195364	0.0323511	0.0865031	0	0.026864	0	0	0.0045337	0	0.0926912	0.0919017	0.0817266	0.0151342	0
morans i	0	0	0	0.0021679	0	0	0	0	2.71639e-05	0	0	0	0	0	0	0	0	0.000576696	0.0010181	0
multilevel model	0.103828	0.073468	0.0234363	0.0690952	0.145978	0.00541221	0.0907074	0.0165179	0	0	0.059088	0.00554299	0	0.0683898	0	6.57028e-05	0.059635	0.0601925	0.0373108	0
multinomial distribution	0.0111737	0.0855652	0.044587	0	0	0.00348716	0.0205054	0	0	0	0.0119372	0	0	0	0	0	0	0.0437839	0.0185169	0
multinomial logistic regression	0.0762489	0.0239802	0.0249075	0.0527088	0.0590979	0	0.0313067	0.0606917	0	0	0.0126346	0	0	0	0.0207971	0.0089498	0	0.128599	0.0112636	0
multiple comparisons correction	0.106973	0.0233031	0.118252	0.0496682	0.0983675	0.106701	0.170943	0.0937731	0.0644687	0.21176	0.150687	0.229264	0	0.11077	0.0407769	0.0447173	0.16486	0.0403955	0.0185332	0.199212
multiple correlation	0.0233111	0	0	0	0.0244282	0	0	0	0.0437435	0	0	0	0	0.0178891	0	0.0133681	0.00394191	0.066829	0.0676499	0
multiple imputation	0.0860639	0.0404124	0	0.110787	0.111674	0	0.0180617	0.0944199	0	0	0	0.00876032	0	0.0187282	0.00372692	0.00381653	0	0.0977943	0	0
multiple sequence alignment	0.0345342	0.0167038	0.0644742	0	0	0.301888	0.0203286	0.0189023	0.0039615	0	0.113606	0	0	0	0	0	0	0.00242163	0.0884092	0.0218321
multivariate distance matrix regression	0	0	0	0	0	0	0.00440391	0	0	0	0	0	0	0	0	0	0.0126643	0	0.00900439	0
mutual information	0.0206746	0	0.140272	0	0	0.00719815	0.00838651	0.031641	0.0191671	0	0.00988455	0	0	0.0128221	0.00719014	0.106597	0.0958888	0.00619743	0.0950014	0.00616045
naive bayes	0	0	0.0476109	0	0	0	0.000242146	0.0151549	0	0	0.0074717	0	0	0	0.114875	0.0830389	0	0.0129658	0.0488992	0
nakagami distribution	0.00229618	0	0	0	0	0.000977107	0	0	0	0	0	0	0	0	0	0.00895657	0	0	0.000368683	0
narrative analysis	0	0	0	0	1.99064e-05	0	0	0	0	0	0	0.000150096	0	0	0	0	0	1.89859e-05	0	0
neural network	0.0361299	0.000690743	0.101756	0.0111735	0	0.045324	0	0.0332538	0.116022	0	0.00643684	0	0.051846	0.00570744	0.203165	0.186688	0.0824102	0.052114	0.0522604	0
newman keuls test	0	0	0	0	0	0	0	0.00988381	0	0	0	0	0	0.0214153	0	0	0.00674997	0.00421951	0.0472779	0
nmf	0	0	0.0379237	0	0	0	0.00879937	0.0209982	0.00768577	0	0	0	0	0	0	0.0177508	0.0217912	0	0.0593601	0
non negative least squares	0	0	0.00380701	0	0	0	0	0	0.00726226	0	0	0	0	0	0	0.00150673	0.00346066	0	0.0138623	0
nonlinear regression	0.1116	0.0303482	0.0705663	0.075393	0.0103023	0.0134245	0.0111441	0.0436144	0.123791	0	0.0720169	0	0	0.0496101	0	0.100337	0.0483911	0.0674651	0.0282608	0
null hypothesis testing	0.0279307	0.0242038	0.0832901	0.132503	0.156511	0.120897	0.169225	0.106007	0.143776	0.414741	0.125311	0.346698	0.343538	0.0480543	0.0986843	0.0622244	0.118343	0.0203488	0	0.237977
one sample t test	0.0040941	0	0	0	0	0	0	0.00585734	0	0	0	0	0	0.032124	0	0	0.0544278	0.0331032	0.0655308	0
ordinal regression	0.0640025	0	0	0.0269454	0.00636875	0	0.0100649	0.0411971	0	0	0.00208469	0	0	0	0	0	0	0.138626	0.000855097	0
ordinary least square	0.0987909	0.0298116	0.0581655	0.0811267	0.0728516	0	0.042257	0	0.0681952	0	0.0716214	0.00283992	0	0.0116915	0	0.0381667	0.0569699	0.100045	0.0292366	0
paired t test	0.0933816	0	0.0685293	0.0269703	0.0555273	0.00885953	0.0302921	0.107279	0.0450903	0.0300173	0.0757952	0.0277079	0	0.22148	0	0.0665076	0.131549	0.0269739	0.0737932	0.0193828
pairwise deletion	0	0	0	0	0.0355756	0.12741	0	0	0	0	0.0158864	0	0	0	0	0	0	0.083545	0.0181327	0
partial correlation	0.0761671	0	0.066668	0.0223651	0.0529508	0	0.0268149	0.0267432	0	0	0.0430808	0	0	0.0607053	0.00303794	0.00622209	0.109389	0.0813277	0.0738567	0
partial least squares	0.0359461	0	0.0444693	0	0.0192225	0	0	0.0196751	0.150875	0	0.031491	0	0	0	0.0837446	0.0508247	0.0363259	0.0637168	0.113375	0.114799
partial least squares - discriminant analysis	0	0	0.020176	0	0	0	0	0.0424135	0.110388	0	0.00409958	0	0	0.0177398	0.0854226	0.00517861	0	0.0156898	0.182167	0.133989
path analysis	0.0743381	0	0.000248557	0.0114157	0.120271	0	0	0	0.0145841	0	0.0481427	0	0	0	0	0.00316087	0.0251616	0.110784	0.017446	0
pca	0.119024	8.41821e-05	0.0848596	0.0719117	0.119081	0.0616522	0.13662	0.080378	0.180357	0.0183744	0.140076	0.0265967	0.183737	0.0530733	0.0722372	0.107644	0.0950554	0.0279515	0	0.293103
percentile/quantile	0.0888106	0.0516066	0.0933861	0.174355	0.121667	0.0583781	0.102801	0.112033	0.068888	0.0664661	0.0773575	0.0723624	0	0.0992808	0.0283953	0.0569703	0.102056	0	0.0531399	0
perceptron	0	0	0.0425338	0	0	0	0	0	0.0300069	0	0	0	0	0	0.118019	0.112862	0.0135257	0.0234121	0.036195	0
permutation test	0.059484	0.0169114	0.0779151	0.0211338	0	0.0188267	0.106007	0.077105	0.0553563	0	0.118663	0	0	0.00985912	0.0321533	0	0.133983	0.0604592	0.100938	0.101501
phi coefficient	0.00440877	0	0	0.000348565	0	0	0	3.51331e-05	0	0	0.00475515	0	0	0	0	0	0	0.0590102	0.0138224	0
phylogenetic tree	0.00429117	0.0102369	0.03611	0.0057231	0	0.275139	0.0593801	0.0132096	0	0	0.130718	0	0	0	0	0	0	0.00185227	0.141868	0.0521923
poisson distribution	0.0827809	0.146888	0.0631707	0.127909	0	0.043807	0.0306591	0.0456414	0.0473678	0	0.0992696	0.0037318	0	0	0	0.0451947	0.0283237	0.0672752	0.015735	0
poisson regression	0.12481	0.112423	0.0339669	0.185105	0.0310887	0.00419356	0.0262567	0.0731627	0	0	0.0904291	0.0263017	0	0	0	0.0174486	0.0216152	0.0849727	0.00340167	0
polychoric correlation	0.00969718	0	0	0	0.0581492	0	0	0	0.00134334	0	0	0	0	0	0	0	0	0.0845748	0	0
power law distribution	0.00415209	0.0114279	0.0309028	0	0	0	0	0	0.0110742	0	0.00129101	0	0	0	0	0.0140393	0.00451162	0.00558141	0.0505208	0
principal component regression	0	0	0.0117129	0	0	0	0.00499045	0	0.0368196	0	0	0	0	0	0.00762073	0.0251611	0.00326024	0.002295	0.0489656	0
probabilistic matrix factorization	7.51522e-05	0.000148918	0.000550674	0	0	0	0	0	0	0	8.56248e-05	0	0	0	0	0.000428604	0	0	0.000710923	0
probit regression	0.0333326	0.0364267	0	0.011548	0.0198137	0	0.000142114	0	0.00312823	0	0	0	0	0	0	0	0	0.0965156	0.0138975	0
procrustes analysis	0	0	0.00600667	0	0	0	9.67286e-06	0	0	0	0.0598773	0	0	0	0	0.00653796	0.000452749	0.00509792	0.090773	0.00691315
qq plot	0.0424386	0.00230323	0.00585507	0.00661101	0	0	0.0749378	0.0062198	0	0	0.0031032	0	0	0.03837	0	0.000265656	0	0.0653644	0.0356989	0
r squared	0.100443	0.00598422	0.0555432	0.0778964	0.0832822	0.026243	0.0700673	0.0358776	0.186963	0.015042	0.0944569	0	0.0308497	0.0902603	0.0531423	0.0917559	0.0478841	0.0429379	0.0264696	0
random effect model	0.151285	0.115181	0.0134288	0.0818433	0.0477554	0	0.110804	0.101787	0	0.026321	0.00236019	0.0174776	0	0.0760404	0	0	0.0590095	0.0881026	0	0
random forest decision tree	0.0416019	0.00319329	0.108194	0.0328469	0.00614969	0.0177441	0.0423063	0.0812815	0.062026	0	0.0878165	0	0	0	0.267688	0.104542	0.0218289	0.0602743	0.0735405	0.0468244
random imputation	0	0	0	0	0	0	0	0.000495638	0	0	0	0	0	0	0	0	0	0.00522483	0	0
rank correlation	0.0870366	0	0.0993853	0.139623	0.0508038	0.0169667	0.0517554	0.139151	0.0175161	0.0269948	0.124286	0.00983082	0	0.120314	0.0317661	0.00814715	0.070817	0.00972716	0.08978	0.0708036
redundancy analysis	0	0	0	0.0226156	0	0	0	0	0	0	0.140776	0	0	0	0	0	0	0.000413099	0.10719	0.02777
regression imputation	0	0	0	0	0	0	0	0.00413417	0	0	0	0	0	0	0	0	0	0.0818082	0	0
regression spline	0.0762057	0.0523676	0.0643695	0.160649	0.0123275	0.0109012	0.0498754	0.0933884	0.0543479	0	0.0864753	0	0	0.0362694	0.0311836	0.0546092	0.0362868	0.0474929	0.0595946	0
repeated measures anova	0.0568574	0	0	0	0.0192242	0	0	0.0202476	0	0	0.011784	0	0	0.182433	0	0	0.0804687	0.0668532	0.0663605	0
ridge regression	0.0182364	0.0271413	0.0796863	7.8605e-05	0	0	0.0576815	0.0186811	0.0286631	0	0	0	0	0	0.073075	0.0299633	0.0284993	0.0462924	0.0600742	0
roc	0.117769	0.0506323	0.107716	0.047266	0.0475021	0.0454093	0.0599979	0.167244	0.0709986	0.0702316	0.0718836	0.105758	0	0.0819318	0.219621	0.101358	0.0752507	0.0593131	0.00769153	0.0681025
scheffe test	0	0	0	0.000409928	0	0	0	0	0	0	0	0	0	0.0118758	0	0	0	0.0269717	0.0187164	0
sequence alignment	0.0381455	0	0.0924542	0	0	0.246857	0.0456842	0.045125	0.0276465	0	0.108612	0	0	2.81826e-06	0.0210435	0.00326327	0	0.00999757	0.115031	0.0538773
shapiro wilk test	0.086136	0	0.00686025	0.0190421	0.0222081	0	0.0175795	0.0780191	0.0105478	0	0.0625227	0	0	0.230633	0	0.00827327	0.0415534	0.0401733	0.0782607	0.0226812
signal filtering	0.0318944	0	0.0155606	0	0	0	0	0	0.0538434	0	0	0	0	0.121294	0	0.141898	0.147458	0.0235396	0.0518551	0
silhouette coefficient	0	0	0.00943862	0.0014006	0	0	0	0.000689235	0	0	0	0	0	0	0	0.00702963	0.0057706	0.0129139	0.0337444	0.00712563
simca	0	0	0	0	0	0	0	0.0322019	0.106857	0	0	0	0	0.00691447	0.0350192	0	0	0.00355495	0.159825	0.09755
simulated annealing	0.00757524	0.0142968	0.0841181	0	0	0.0528141	0.00143522	0	0.0795291	0	0.0229105	0	0	0	0	0.0487764	0.00368675	0	0.0448606	0
singular value decomposition	0.00792856	0.00632195	0.0759173	0	0	0.000614693	0.0316056	0.00452236	0.0858906	0	0.0130108	0	0	0	0	0.0881041	0.0748482	0.0181598	0.110924	0.0166827
skewness	0.0946238	0.0414399	0.0542255	0.0627699	0.183849	0.00643816	0.0640012	0.0693256	0.122692	0	0.0635097	0	0	0.117507	0.00543531	0.10474	0.0681364	0	0.0148109	0
sphericity test	0.00662459	0	0	0	0.0346761	0	0	0	0.00782243	0	0	0	0	0.0344618	0	0	0.00507314	0.0434717	0.050465	0
standard error	0.0499679	0.0876462	0.0796175	0.112281	0.167345	0.0654259	0.130069	0.0828194	0.150937	0.202927	0.11721	0.153741	0.0737589	0.0935879	0.0158306	0.0531884	0.0972434	0	0.059491	0
state space model	0	0.017438	0.0162062	0	0	0	0	0	0	0	0	0	0	0	0	0.028538	0	0.00566015	0.00332049	0
statistical power	0.10185	0.0521386	0.0650555	0.0676545	0.115928	0.0244602	0.153667	0.0970171	0.0140452	0.0550873	0.086398	0.0664349	0	0.130373	0.00411287	0.018145	0.104619	0.0179734	0.0496407	0
stepwise regression	0.106524	0.0213629	0.0345558	0.0994487	0.0604108	0	0.0817818	0.116694	0.0538532	0	0.123016	0	0	0.0591593	0.0620522	0.0386608	0.0364801	0.0583389	0.0296717	0
string distance	0	0	0.0315794	0	0	0.0151081	0	0	0	0	0	0	0	0	0	0	0.0130934	0.020919	0.040953	0
structural equation modeling	0.124315	0.0290228	0.0228847	0.0268558	0.232996	0	0.0427836	0	0.0731104	0	0.061437	0	0	0	0	0.0115457	0.0641789	0.0571265	0	0
support vector machine	0.0251505	0	0.102972	0	0	0.00947074	0.0149591	0.0600693	0.0750456	0	0.000121692	0	0	0.00141943	0.226198	0.152819	0.0831034	0.0305381	0.0793643	0.0227413
survival analysis - general	0.134019	0.0802814	0.0731512	0.0807701	0.0145107	0.01316	0.0532887	0.210707	0.0127766	0.0168046	0.0649054	0.0859931	0	0.0168296	0.0126067	0.0122792	0.0022547	0.0929075	0.0335777	0
symmetric distribution	0.00287492	0.00471493	0	0	0	0	0	0.00706746	0.0133973	0	0	0	0	0	0	0.0169307	0	0.0516797	0.027871	0
t test	0.108778	0.0231894	0.111858	0.0823376	0.134997	0.0825188	0.100787	0.113602	0.130625	0.258233	0.123518	0.224818	0.00210135	0.105408	0.0522081	0.0803249	0.162105	0.0299612	2.26634e-05	0.208402
thematic analysis	0	0	0	0.0272234	0.00507061	0	0	0.000779746	0	0	0	0.00720934	0	0.0119122	0	0	0	0.122523	0.00387114	0
tsne	0	0	0.0961278	0	0	0.0119877	0	0.0444141	0	0	0	0	0	0	0.0274807	0.0226345	0.00641921	0	0.103913	0.0198447
tukey hsd test	0.0378589	0	0	0	0	0	0	0.00584884	0	0	0.0731839	0	0	0.0720652	0	0	0.0352344	0.0482874	0.116672	0
two sample t test	0.0797617	0	0	0.0142436	0.0541571	0	0.0115805	0.0918906	0	0	0.00996207	0	0	0.159047	0	0	0.0645724	0.0671646	0.0676364	0.00751186
type i error	0.105102	0.057974	0.0520478	0.010695	0.0992121	0.0115905	0.142389	0.0821137	0.0113581	1.22913e-05	0.0851371	0.0507008	0	0.121352	0.0168741	0.0205899	0.087112	0.0466613	0.03795	0
type ii error	0.0647499	0.0181949	0.000970818	0	0.0139191	0	0.0334834	0.0209132	0	0	0.0305747	0	0	0.0620046	0.00928917	0.0120176	0.0391081	0.10363	0.0398677	0
uniform distribution	0.0491621	0.143576	0.0956906	0.0261997	0.000656581	0.0463374	0.0578448	0.0103078	0.122753	0	0.0424087	0	0.00742769	0.0154306	0	0.0941696	0.0843057	0.0561956	0.0349396	0
uniform scaling	0.000991742	0	0.00234274	0	0	0	0	0	0.00358072	0	0	0	0	0	0	0	0.000155435	0	0.00635833	0
von mises distribution	0.00351483	0.0195777	0.00684668	0	0	0	0	0	0	0	0.0050259	0	0	0	0	0.00715545	0.0412806	0.0235262	0.0227085	0
wald test	0.120929	0.0201727	0.0477767	0.0963491	0.0582846	0.00275088	0.0976365	0.111134	0.00191204	0	0.0567068	0	0	0.000503098	0	0	0.0159161	0.0856814	0.0281547	0
wavelet analysis	0.0242116	0.0080267	0.0164236	0.00813887	0	0	0	0.00503921	0.0356418	0	0	0	0	0.0289011	0.00215167	0.163359	0.0810153	0.00625166	0.0680742	0
wilcoxon signed-rank test	0.0755411	0	0.0664909	0.0267971	0.00609414	0.0237212	0.00801426	0.120788	0.00293619	0	0.0664601	0	0	0.176119	0.0101674	0.0408502	0.0868212	0.0386905	0.0741457	0.0290772
z curve	0.0109055	0	0	0	0	0	0.0291403	0.0236003	0	0	0	0	0	0	0	7.6233e-06	0	0.0163761	0	0
z test	0.109248	0.0241688	0.0540056	0.0266674	0.0542705	0.0471184	0.0969081	0.0937421	0	0	0.067326	0	0	0.0380529	0	0.00520709	0.092918	0.093614	0.0221917	0
z-score	0.0860983	0.00445835	0.109904	0.117219	0.123775	0.0910458	0.124412	0.0965885	0.0630251	0.0229147	0.0720813	0.0702004	0	0.0977507	0.0413672	0.0416695	0.144423	0.00864824	0.0689983	0.0619584
